# Supplementary material for: Outcomes over the first two years of treatment with mepolizumab in severe asthma
Source: PubMed Central journal article supplement — Eur Respir J. 2021 Dec 23;58(6):2101313. doi: 10.1183/13993003.01313-2021 (PMC8696189; doi:10.1183/13993003.01313-2021), 2021-12-23

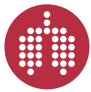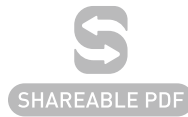

# Outcomes over the first two years of treatment with mepolizumab in severe asthma

Lynn Elsey <sup>1</sup>, Thomas Pantin <sup>1</sup>, Leanne-Jo Holmes<sup>1</sup>, Gael Tavernier <sup>1,2</sup> and Stephen J. Fowler <sup>1,2</sup>

<sup>1</sup>North West Lung Centre, Manchester University NHS Foundation Trust, Manchester, UK. <sup>2</sup>Faculty of Biology, School of Biological Sciences, Medicine and Health, University of Manchester, Manchester Academic Health Science Centre and NIHR Manchester Biomedical Research Centre, Manchester University Hospitals NHS Foundation Trust, Manchester, UK.

Corresponding author: Lynn Elsey ([lynn.elsey@mft.nhs.uk](mailto:lynn.elsey@mft.nhs.uk))

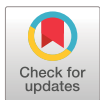

Shareable abstract (@ERSpublications)

**This study found that 30% of patients stopped mepolizumab in the second year of treatment. Those with a sustained response had lower blood eosinophils and better asthma control questionnaire scores prior to starting mepolizumab.** <https://bit.ly/3ChWN63>

**Cite this article as:** Elsey L, Pantin T, Holmes L-J, *et al.* Outcomes over the first two years of treatment with mepolizumab in severe asthma. *Eur Respir J* 2021; 58: 2101313 [DOI: 10.1183/13993003.01313-2021].

This single-page version can be shared freely online.

Copyright ©The authors 2021.

This version is distributed under the terms of the Creative Commons Attribution Non-Commercial Licence 4.0. For commercial reproduction rights and permissions contact [permissions@ersnet.org](mailto:permissions@ersnet.org)

Received: 7 May 2021  
Accepted: 26 Sept 2021

*To the Editor:*

Mepolizumab was the first anti-interleukin-5 (anti-IL-5) monoclonal antibody licensed for the treatment of severe asthma, recommended as add-on treatment in patients with frequent exacerbations or requiring maintenance oral corticosteroids (OCS) despite optimal inhaled therapy [1, 2]. In clinical trials it reduced exacerbation rates and OCS use, and improved lung function, asthma control and health-related quality of life over the first year of treatment [3–6]. Current guidance states that anti-IL-5 biologics should be continued long term if benefit is demonstrated over the first year, yet little is known about whether initial responses are sustained, or whether they can be predicted by clinical characteristics.

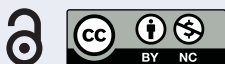

Supplement: ERJ-01313-2021.Shareable.pdf [file ERJ-01313-2021.Shareable.pdf]
